# Supplementary material for: Fencing affects movement patterns of two large carnivores in Southern Africa
Source: Frontiers journal article supplement (doi:10.3389/fevo.2023.1031321), 2023-06-09
Supplement: Table_1.DOCX [file Table_1.DOCX]

**Supplementary material**

Fencing affects movement patterns of two large carnivores in Southern Africa

Authors: Dipanjan Naha1,2, Stéphanie Périquet2, J. Werner Kilian4, Caitlin Kupferman1,3, Tammy Hoth-Hanssen5, James C. Beasley1,3

1University of Georgia, Savannah River Ecology Laboratory, Aiken, SC, United States.

2Ongava Research Centre, Outjo, Namibia.

3Warnell School of Forestry and Natural Resources, Athens, GA, United States

4Etosha Ecological Institute, Okaukuejo, Etosha NP, Namibia.

5Namibian Lion Trust, Northern Namibia.

**Supplementary Table 1**

Results of the linear mixed-effects model for step length explaining the effect of the Etosha fence on the movement behaviour of GPS-collared lions in the Greater Etosha Landscape (Etosha National Park and the surrounding human-dominated landscape within 40 km buffer), Namibia from 2007-2020.

| **Variables (Fixed Effects)** | **Est (ß)** | **SE** | **t-value** | **P value** |
| --- | --- | --- | --- | --- |
| Intercept | 635.50 | 79.64 | 7.98 | <0.005 |
| Season Warm Dry | -54.23 | 14.72 | -3.68 | <0.005 |
| Season Warm Wet | -47.81 | 13.81 | -3.46 | <0.005 |
| Time zone Night | 532.43 | 11.77 | 45.25 | <0.005 |
| Sex Male | -34.68 | 100.51 | -0.35 | 0.73 |
| Age subadult | 29.59 | 74.56 | 0.39 | 0.69 |
| Location outside Etosha | -266.31 | 23.44 | -11.36 | <0.005 |
| Distance Fence 0.5-1km | -96.88 | 29.99 | -3.23 | <0.005 |
| Distance Fence 0-0.5km | 37.49 | 29.34 | 1.28 | 0.20 |
| Time zone Night:Distance Fence  0.5-1km | 89.10 | 38.13 | 2.34 | 0.01 |
| Time zone Night:Distance Fence  0-0.5km | 143.37 | 36.68 | 3.91 | <0.005 |

**Supplementary Table 2**

Results of the linear mixed-effects model for step length explaining the effect of the Etosha fence on the movement behaviour of GPS-collared hyenas in the Greater Etosha Landscape (Etosha National Park and the surrounding human-dominated landscape within 40 km buffer), Namibia from 2008-2020.

| **Variables (Fixed Effects)** | **Est (ß)** | **SE** | **t-value** | **P value** |
| --- | --- | --- | --- | --- |
| Intercept | 364.04 | 105.39 | 1.61 | <0.005 |
| Season Warm Dry | -229.58 | 108.49 | -2.12 | 0.036 |
| Season Warm Wet | 100.98 | 77.45 | 1.30 | 0.192 |
| Time zone Night | 1432.81 | 62.59 | 22.89 | <0.005 |
| Location outside Etosha | -38.20 | 142.13 | -0.27 | 0.789 |
| Distance Fence 0.5-1km | 132.07 | 209.98 | 0.63 | 0.529 |
| Distance Fence 0-0.5km | 830.35 | 345.36 | 2.40 | 0.016 |
| Time zone Night:Distance  Fence 0.5-1km | -47.50 | 271.15 | -0.17 | 0.861 |
| Time zone Night:Distance  Fence 0-0.5km | -438.72 | 379.24 | -1.157 | 0.247 |

**Supplementary Table 3**

Results of the linear mixed-effects model for path straightness index explaining the effect of the Etosha fence on the movement behaviour of GPS-collared lions in the Greater Etosha Landscape (Etosha National Park and the surrounding human-dominated landscape within 40 km buffer), Namibia from 2007-2020.

| **Variables (Fixed Effects)** | **Est (ß)** | **SE** | **t-value** | **P value** |
| --- | --- | --- | --- | --- |
| Intercept | 0.74 | 0.02 | 35.79 | <0.005 |
| Season Warm Dry | -0.02 | 0.01 | -2.14 | 0.020 |
| Season Warm Wet | -0.04 | 0.009 | -4.84 | <0.005 |
| Time zone Night | -0.05 | 0.008 | -6.53 | <0.005 |
| Distance Fence 0-0.5km | -0.04 | 0.02 | -2.11 | 0.035 |
| Distance Fence 0.5-1km | -0.10 | 0.02 | -4.35 | <0.005 |
| Sex Male | -0.009 | 0.02 | -0.37 | 0.72 |
| Age Subadult | 0.01 | 0.02 | 0.44 | 0.668 |
| Time zone Night:Distance Etosha  category 0-0.5km | -0.01 | 0.03 | -0.38 | 0.706 |
| Time zone Night:Distance Etosha  category 0.5-1km | -0.02 | 0.04 | -0.53 | 0.595 |

**Supplementary Table 4**

Results of the linear mixed-effects model for path straightness index explaining the effect of the Etosha fence on the movement behaviour of GPS-collared hyenas in the Greater Etosha Landscape (Etosha National Park and the surrounding human-dominated landscape within 40 km buffer), Namibia from 2008-2020.

| **Variables (Fixed Effects)** | **Est (ß)** | **SE** | **t-value** | **P value** |
| --- | --- | --- | --- | --- |
| Intercept | 0.81 | 0.02 | 32.34 | <0.005 |
| Season Warm Dry | -0.14 | 0.04 | -3.45 | <0.005 |
| Season Warm Wet | -0.03 | 0.03 | -0.98 | 0.327 |
| Time zone Night | -0.22 | 0.03 | -7.22 | <0.005 |
| Distance Fence 0-0.5km | 0.05 | 0.27 | 0.21 | 0.832 |
| Distance Fence 0.5-1km | -0.01 | 0.10 | -0.12 | 0.905 |
| Time zone Night:Distance Fence  category 0-0.5km | 0.03 | 0.38 | 0.08 | 0.932 |
| Time zone Night:Distance Fence  category 0.5-1km | -0.07 | 0.22 | -0.33 | 0.739 |

**Supplementary Table 5**

Results of the generalized linear mixed-effects model explaining the Etosha fence crossing by GPS-collared lions and influence of environmental, seasonal, temporal and land management related variables in the Greater Etosha Landscape (Etosha National Park and the surrounding human-dominated landscape within 40 km buffer), Namibia from 2007-2020.

| **Variables (Fixed Effects)** | **Est (ß)** | **SE** | **z-value** | **P-value** |
| --- | --- | --- | --- | --- |
| Intercept | -1.97 | 0.27 | -7.27 | 0.001 |
| Season Warm Dry | 0.26 | 0.13 | 1.94 | 0.052 |
| Season Warm Wet | -0.29 | 0.13 | -2.31 | 0.021 |
| Time zone Night | 0.54 | 0.16 | 3.27 | 0.001 |
| Habitat type Closed to open  shrubland | 1.14 | 0.59 | 1.92 | 0.055 |
| Habitat type Mosaic Forest  shrubland Grassland | 0.47 | 0.79 | 0.60 | 0.547 |
| Habitat type Mosaic vegetation  croplands | 1.19 | 0.21 | 5.71 | <0.005 |
| Land use type PA | -0.86 | 0.18 | -4.84 | 0.001 |
| Sex Male | -0.69 | 0.31 | -2.26 | 0.023 |
| Age Subadult | -0.74 | 0.33 | -2.24 | 0.024 |
| Time zone night:Land use type PA | 0.63 | 0.21 | 2.93 | 0.003 |

**Supplementary Table 6**

Results of the generalized linear mixed-effects model explaining the Etosha fence crossing by GPS-collared hyenas and influence of environmental, seasonal, temporal and land management related variables in the Greater Etosha Landscape (Etosha National Park and the surrounding human-dominated landscape within 40 km buffer), Namibia from 2008-2020.

| **Variables (Fixed Effects)** | **Est (ß)** | **SE** | **z-value** | **P-value** |
| --- | --- | --- | --- | --- |
| Intercept | 1.43 | 1.32 | 1.08 | 0.282 |
| Season Warm Dry | 0.50 | 0.51 | 0.99 | 0.322 |
| Season Warm Wet | 1.32 | 0.48 | 2.75 | 0.005 |
| Time zone Night | -2.72 | 1.33 | -2.04 | 0.041 |
| Habitat type Closed to open shrubland | 0.22 | 0.64 | 0.35 | 0.726 |
| Habitat type Mosaic Forest shrubland  Grassland | -1.04 | 0.98 | -1.06 | 0.286 |
| Habitat type Mosaic vegetation  croplands | 0.88 | 1.02 | 0.87 | 0.387 |
| Habitat type Open broadleaved  deciduous forest | 0.09 | 0.91 | 0.09 | 0.922 |
| Land use type PA | -5.21 | 1.35 | -3.85 | 0.001 |
| Time zone night:Land use type PA | 4.12 | 1.42 | 2.92 | 0.003 |
